# Supplementary material
Source: publisher site journal article supplement (https://www.dovepress.com/article/571867)
Supplement: Supplementary file 1 [file 571867_Supplementary%20Appendix.docx]

# Supplementary Appendix

## Table A1. Baseline covariate balance before and after inverse probability of treatment weighting (IPTW)

| Covariate | Raw SMD / Variance ratio | Weighted SMD / Variance ratio |
| --- | --- | --- |
| Age | –0.83/0.82 | 0.08/0.76 |
| Male | 0/1 | –0.17/1.03 |
| Baseline AL | 0.2/1.05 | 0.21/1.44 |

Standardized mean differences (SMD) and variance ratios of baseline covariates (age, sex, baseline axial length) before and after IPTW. An absolute SMD <0.25 and variance ratio between 0.5 and 2 are considered indicative of adequate balance.

## Table A2. Effective sample size (ESS) after IPTW

| Group | Original n | Weighted ESS |
| --- | --- | --- |
| OK-only | 36 | 24.96 |
| RLRL+OK | 36 | 22.91 |

ESS was calculated within each group as (Σw)^2 / Σw^2, where w denotes stabilized IPTW weights. ESS reflects the precision retained after weighting.

## Table A3. Estimated marginal means of axial length at 0, 3, 6, and 12 months (IPTW-weighted LME model)

| Group | 0m | 3m | 6m | 12m |
| --- | --- | --- | --- | --- |
| OK-only | 24.402 (24.373–24.431) | 24.471 (24.425–24.517) | 24.562 (24.509–24.615) | 24.642 (24.589–24.694) |
| RLRL+OK | 24.423 (24.395–24.450) | 24.339 (24.310–24.368) | 24.313 (24.262–24.364) | 24.343 (24.274–24.412) |

Values are estimated marginal means (EMMs) and 95% confidence intervals of axial length (mm), derived from IPTW-weighted linear mixed-effects LME models. EMMs are adjusted for age, sex, and baseline axial length.

## Table A4. Sensitivity analysis using propensity score matching (PSM)

| Model | Coefficient (mm) | 95% CI | p-value |
| --- | --- | --- | --- |
| PSM matched sample | –0.255 | –0.344 to –0.165 | <0.001 |

Linear regression of 12-month axial elongation (ΔAL) on treatment group in the 1:1 nearest neighbor PSM-matched cohort, adjusted for age, sex, and baseline axial length. Results are expressed as regression coefficients (mm) with 95% confidence intervals. (RLRL+OK vs OK-only)

## Table A5. Per-protocol analysis of ΔAL (adherence ≥80%)

| **Timepoint** | **Group difference (RLRL+OK vs OK-only)** | **95% CI** | ***p*-value** |
| --- | --- | --- | --- |
| 3 months | −0.132 mm | −0.189 to −0.076 | <0.001 |
| 6 months | −0.249 mm | −0.324 to −0.174 | <0.001 |
| 12 months | −0.298 mm | −0.388 to −0.209 | <0.001 |

Results from IPTW-weighted linear mixed-effects models restricted to participants with RLRL adherence ≥80%. Models adjusted for age, sex, and baseline AL, with subject-level random intercepts and cluster-robust SEs.

## Table A6. Dose–response analysis of adherence to RLRL therapy (per 10% increase)

| **Timepoint** | **Coefficient (mm)** | **95% CI** | ***p*-value** |
| --- | --- | --- | --- |
| 3 months | −0.071 | −0.101 to −0.042 | <0.001 |
| 6 months | −0.124 | −0.151 to −0.096 | <0.001 |
| 12 months | −0.148 | −0.195 to −0.102 | <0.001 |

## Figure A1. Love plot of baseline covariate balance before and after IPTW


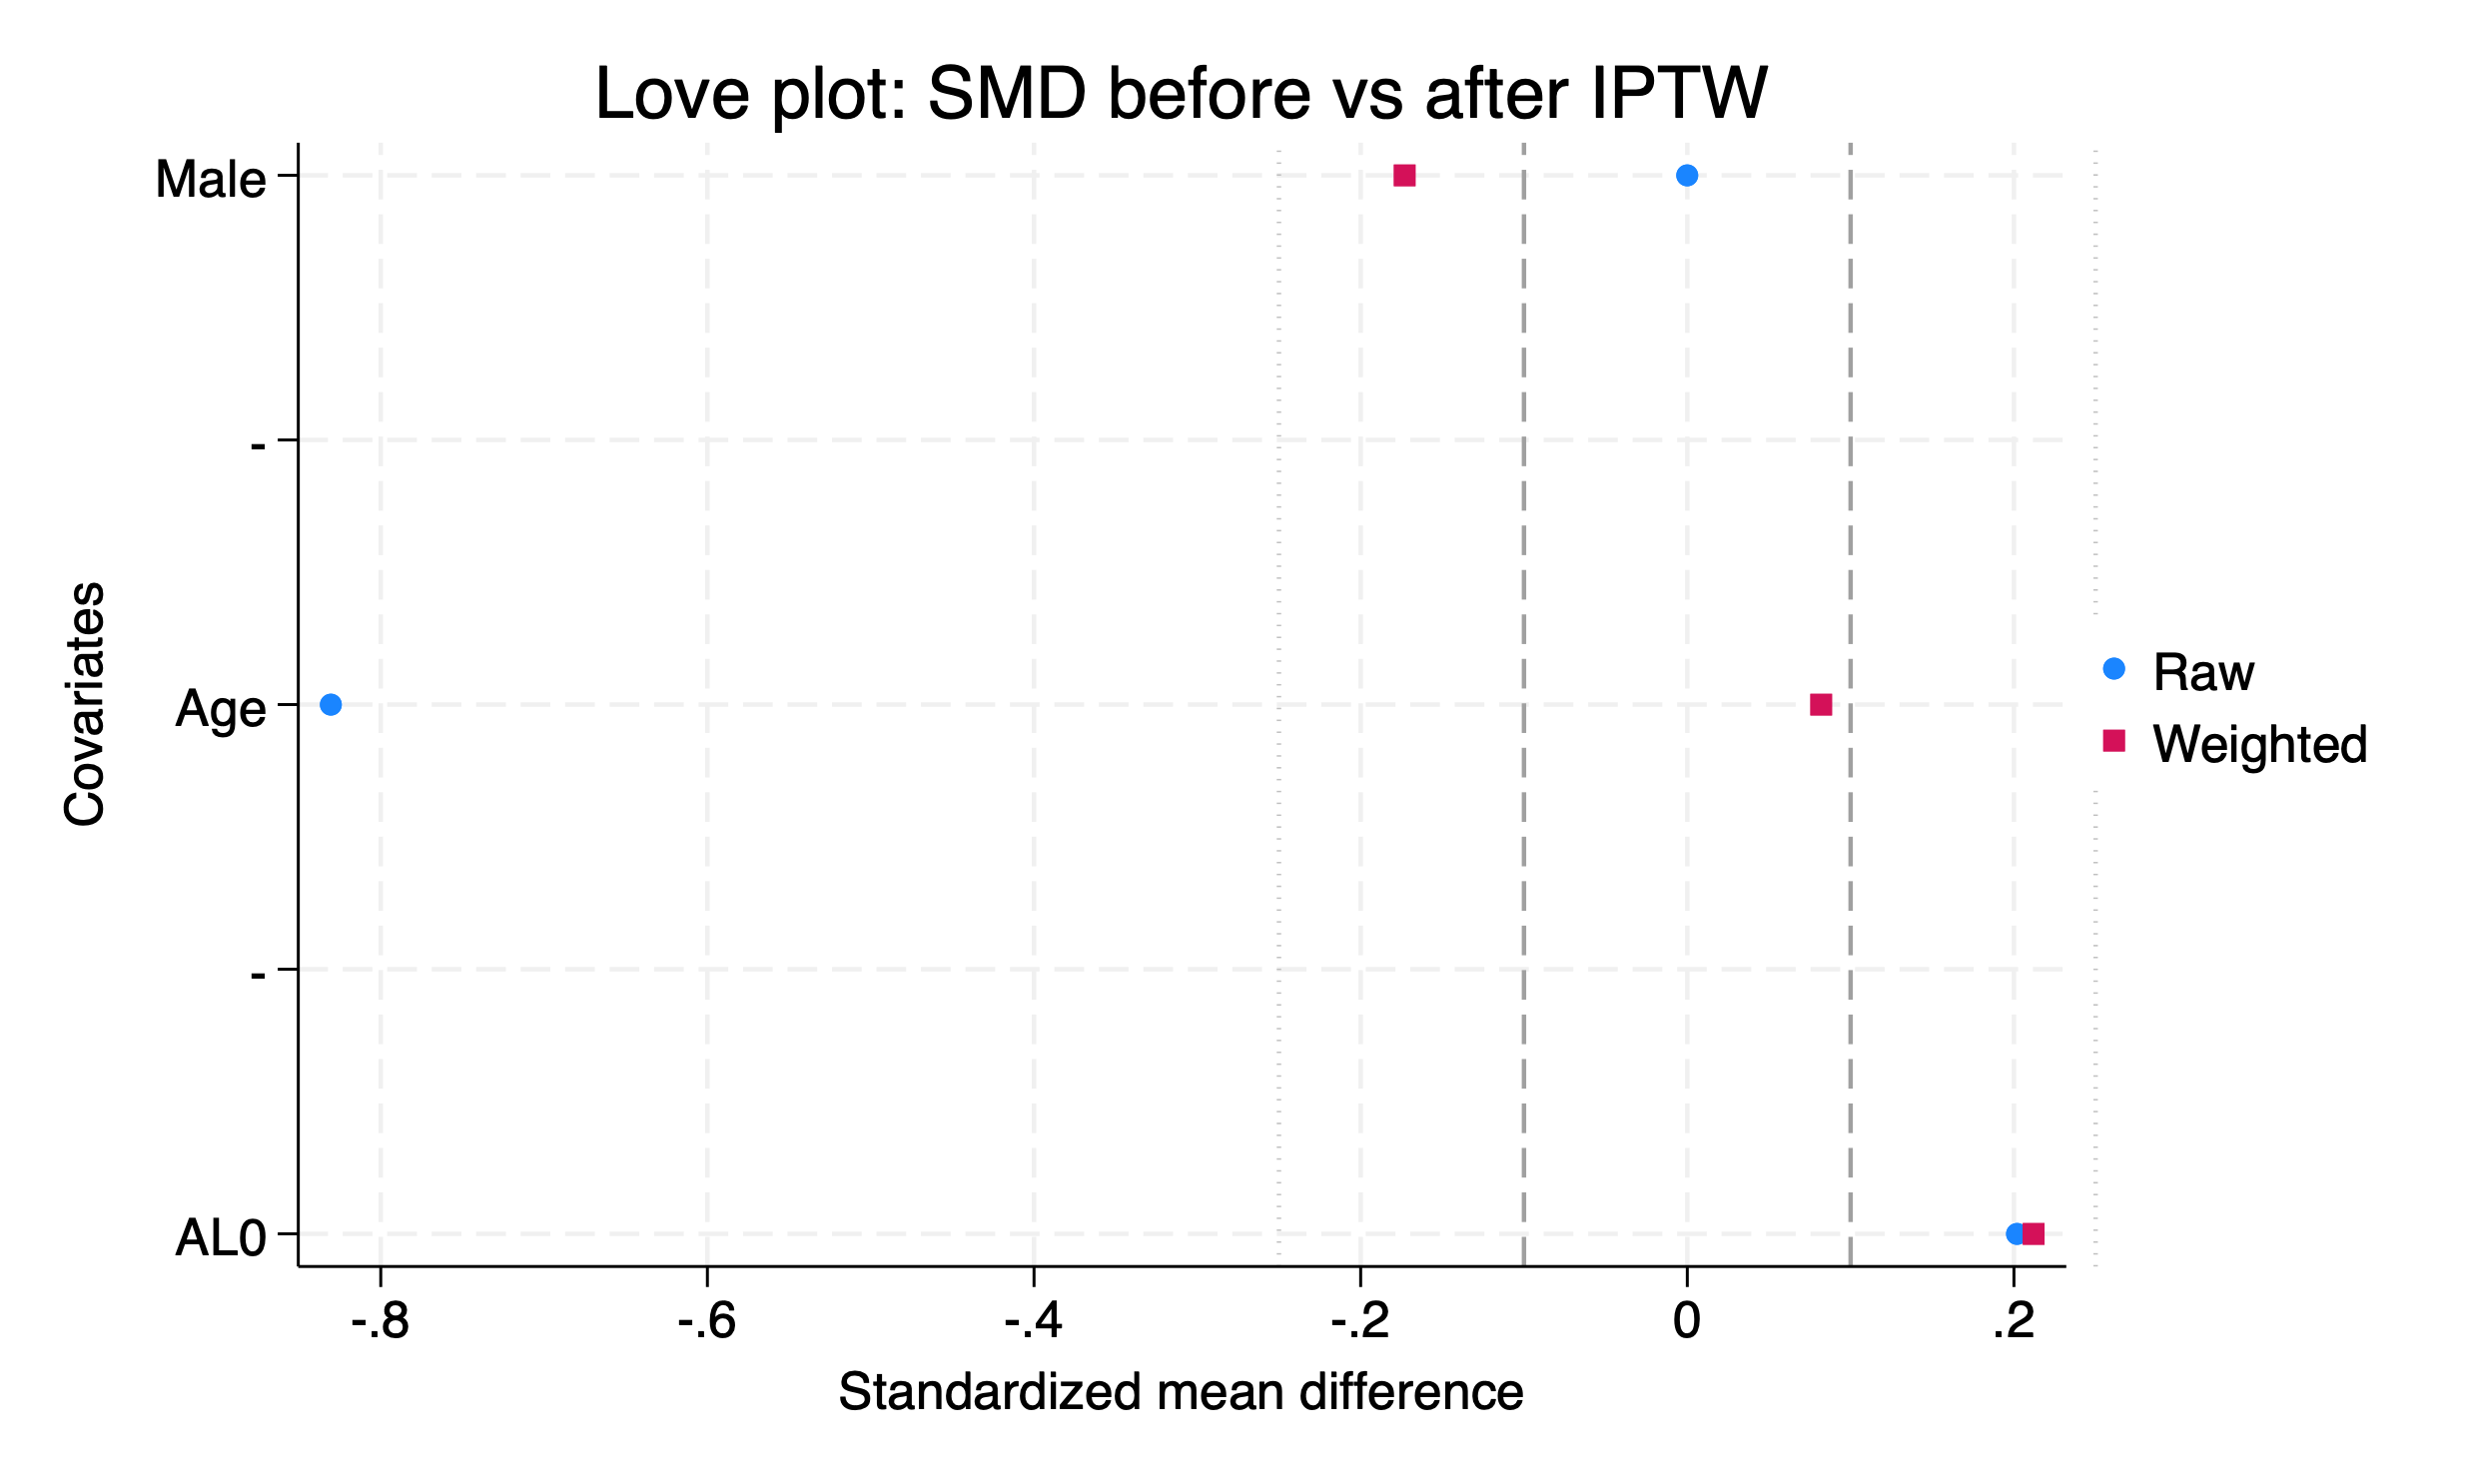


SMD of baseline covariates (age, sex, baseline axial length) before and after IPTW. Circles represent unweighted covariates, and squares represent weighted covariates. The vertical dashed line indicates |SMD| = 0.25.

## Figure A2. Diagnostic plots of the IPTW-weighted LME model.


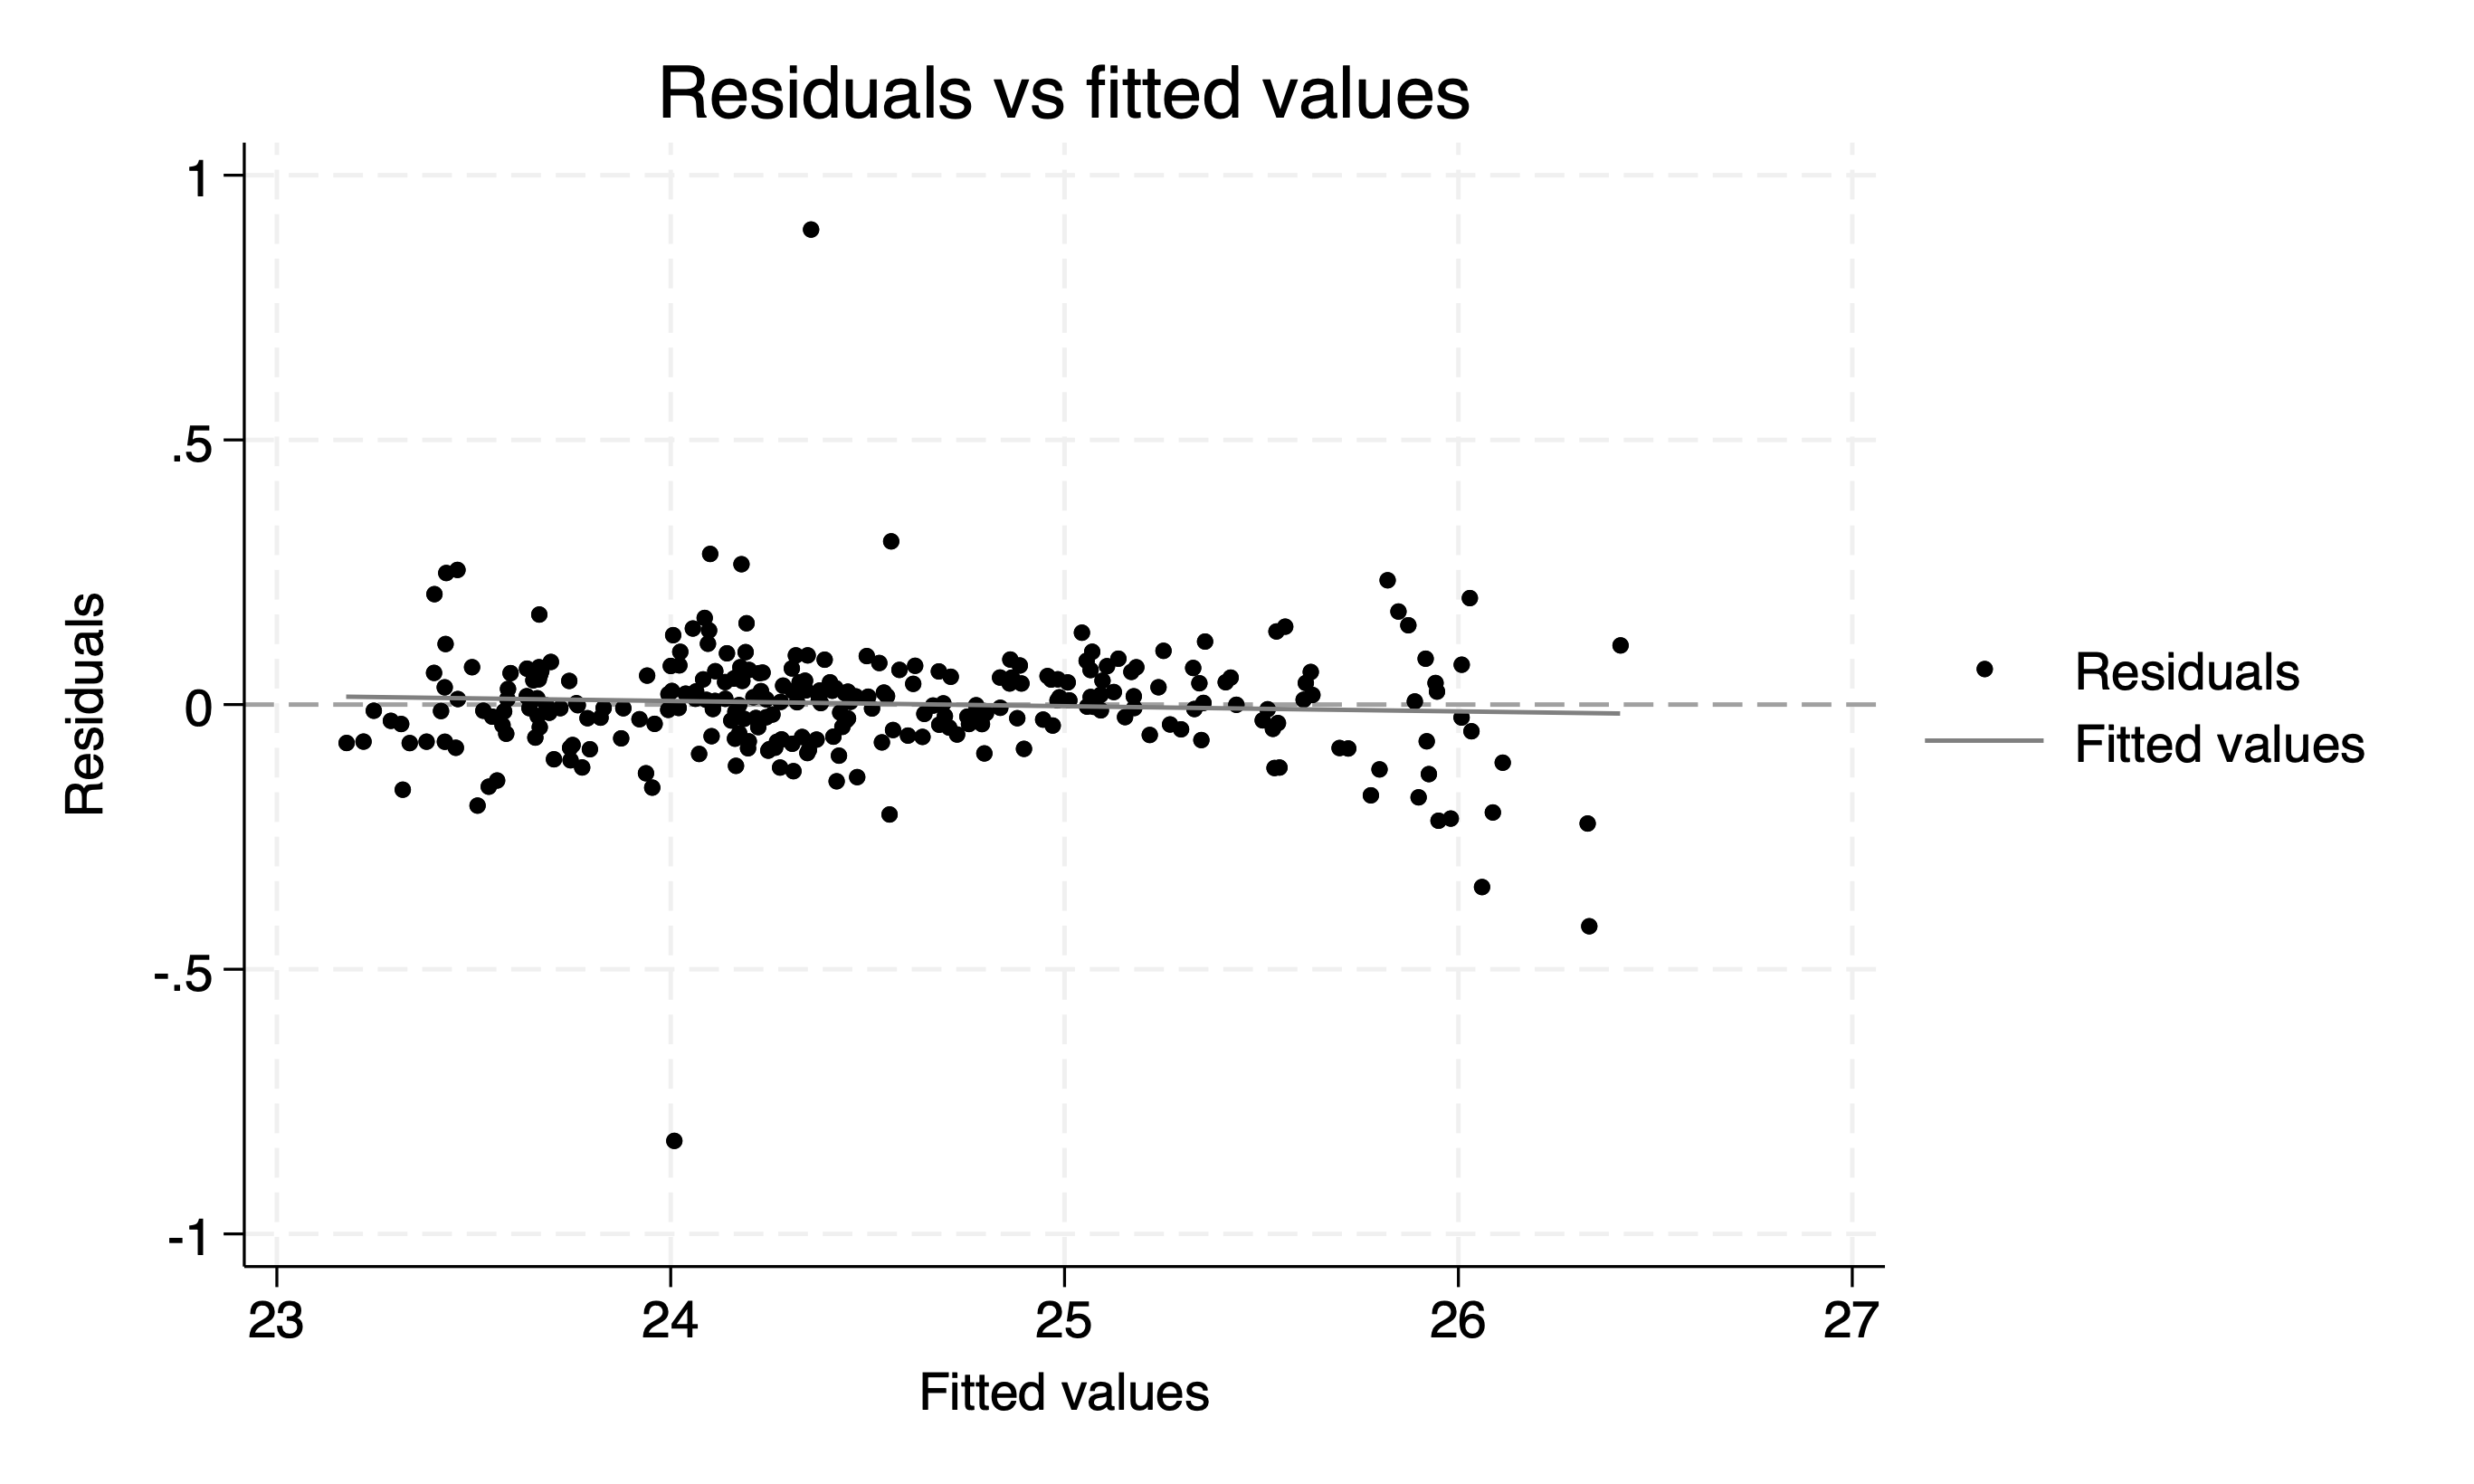


(a) Residuals versus fitted values. The residuals were symmetrically distributed around zero without obvious heteroscedasticity.


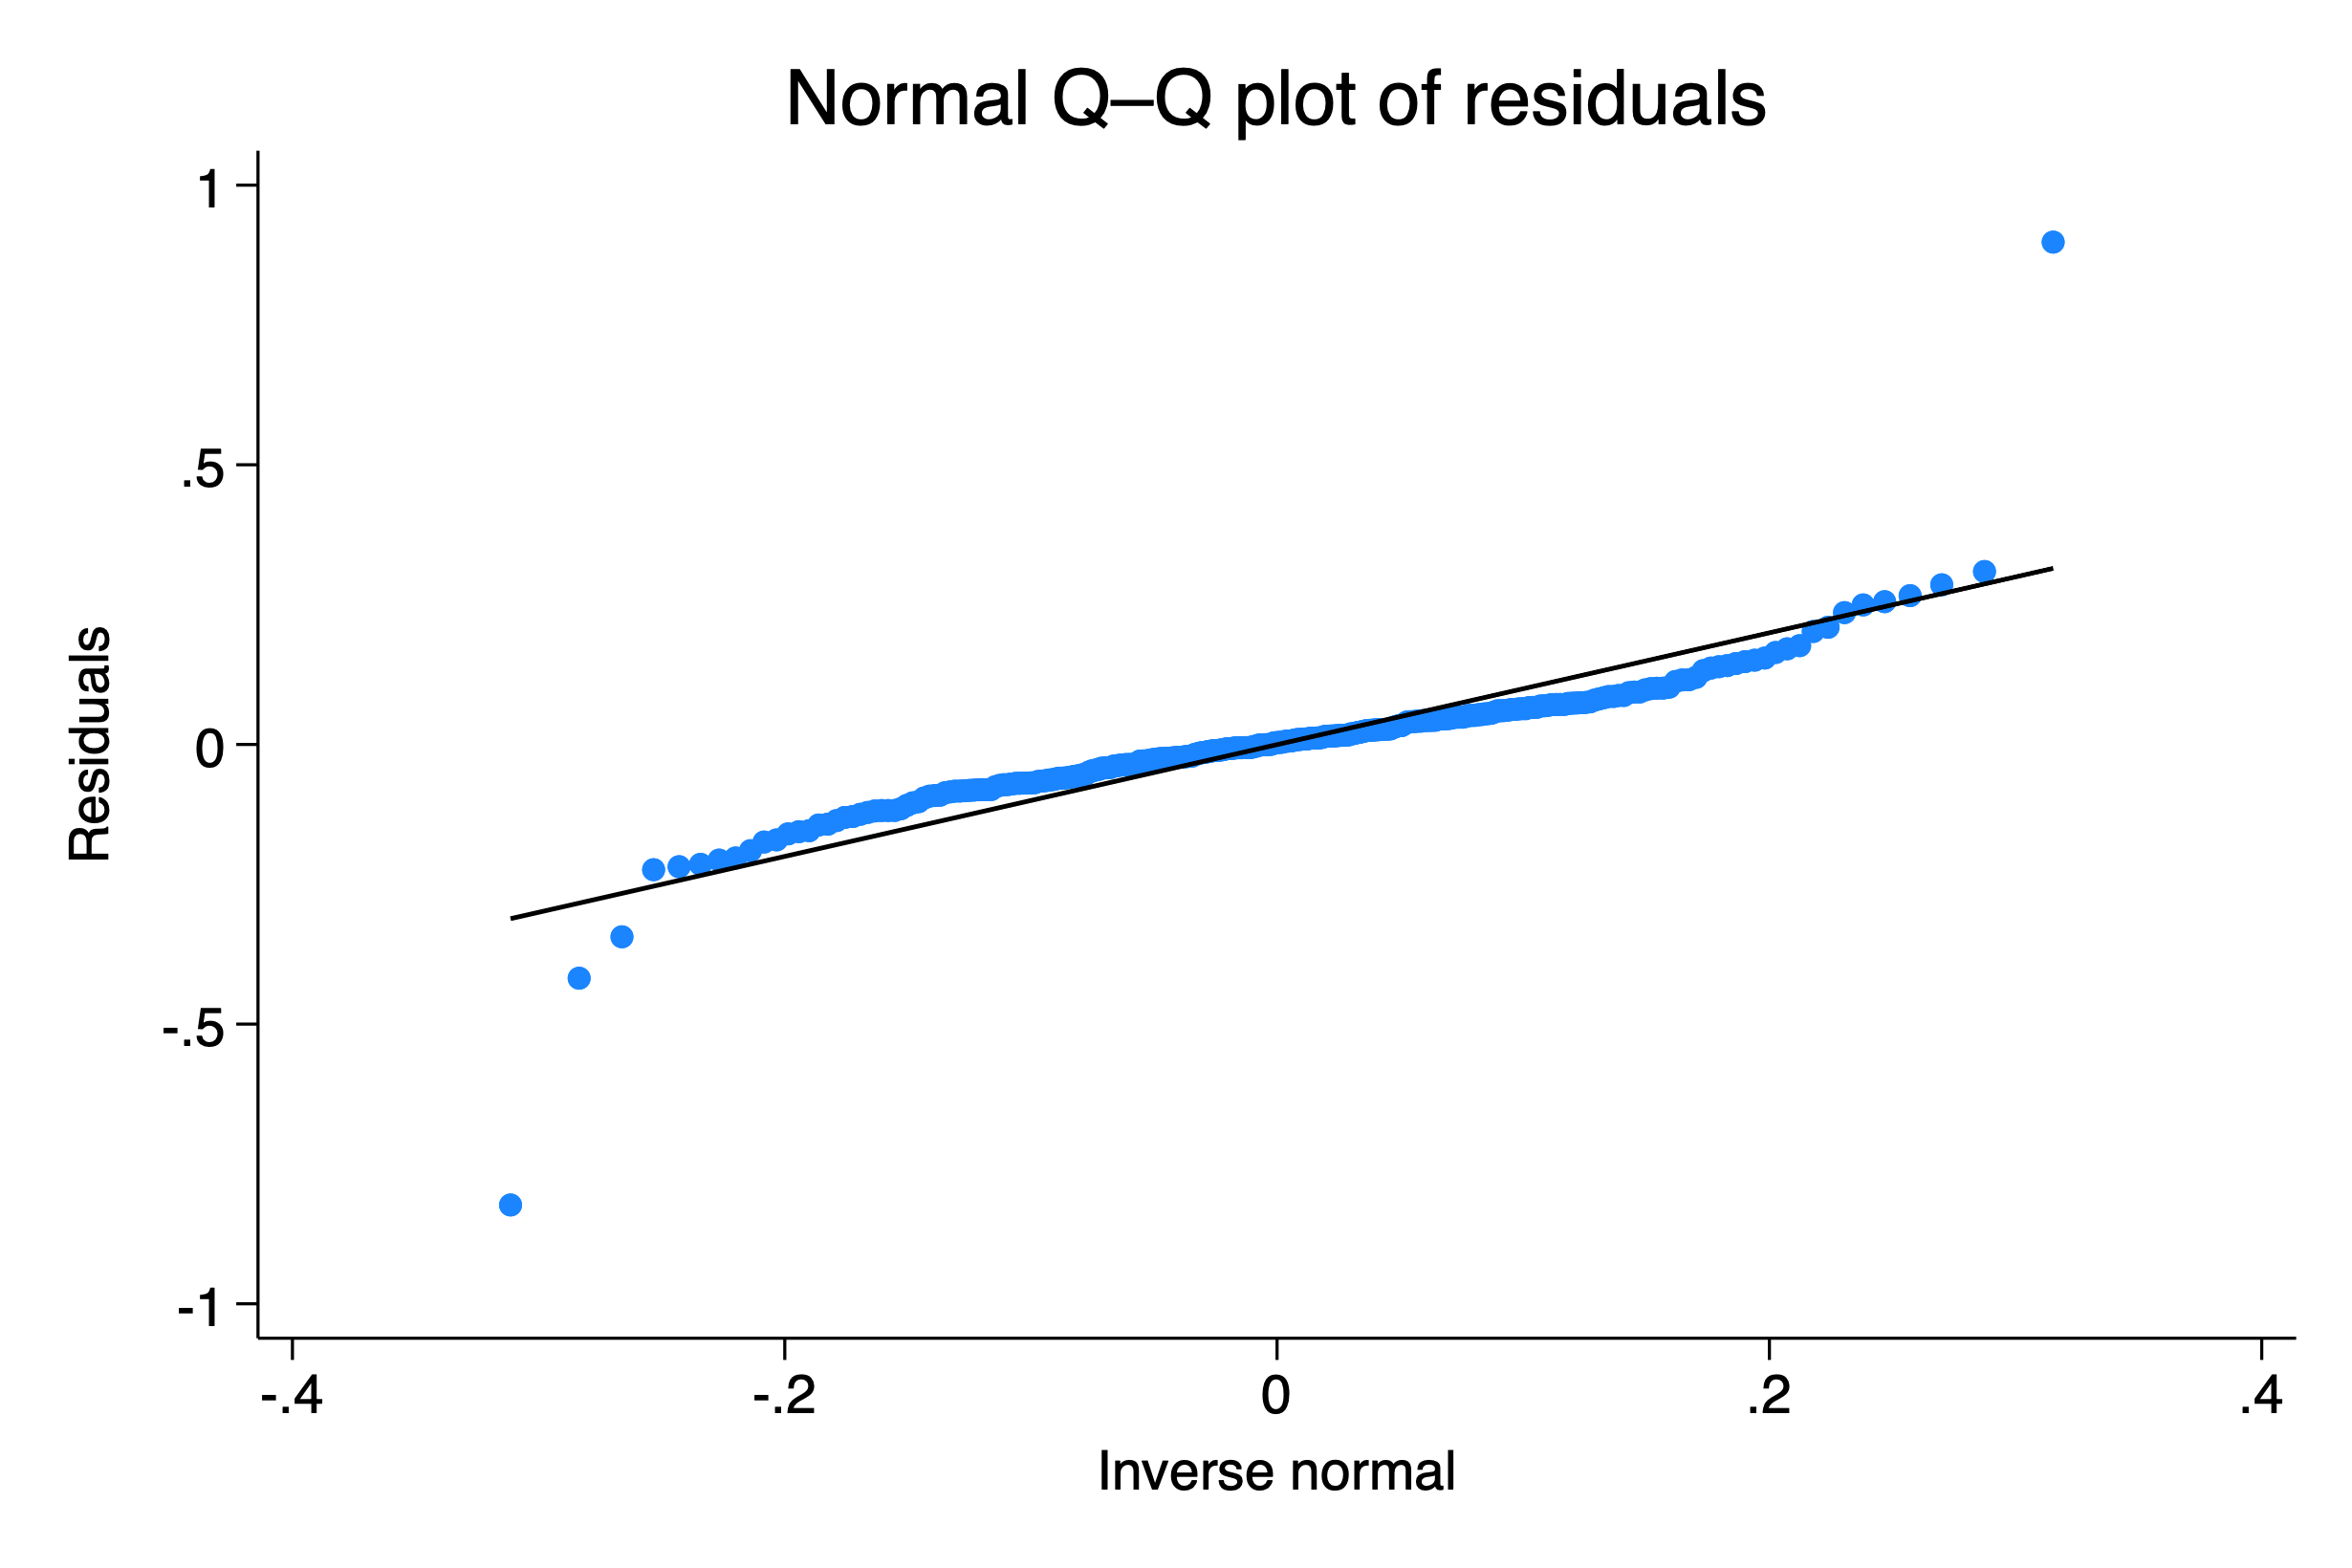


(b) Normal Q–Q plot of residuals. The points closely followed the 45° reference line, suggesting approximate normality.


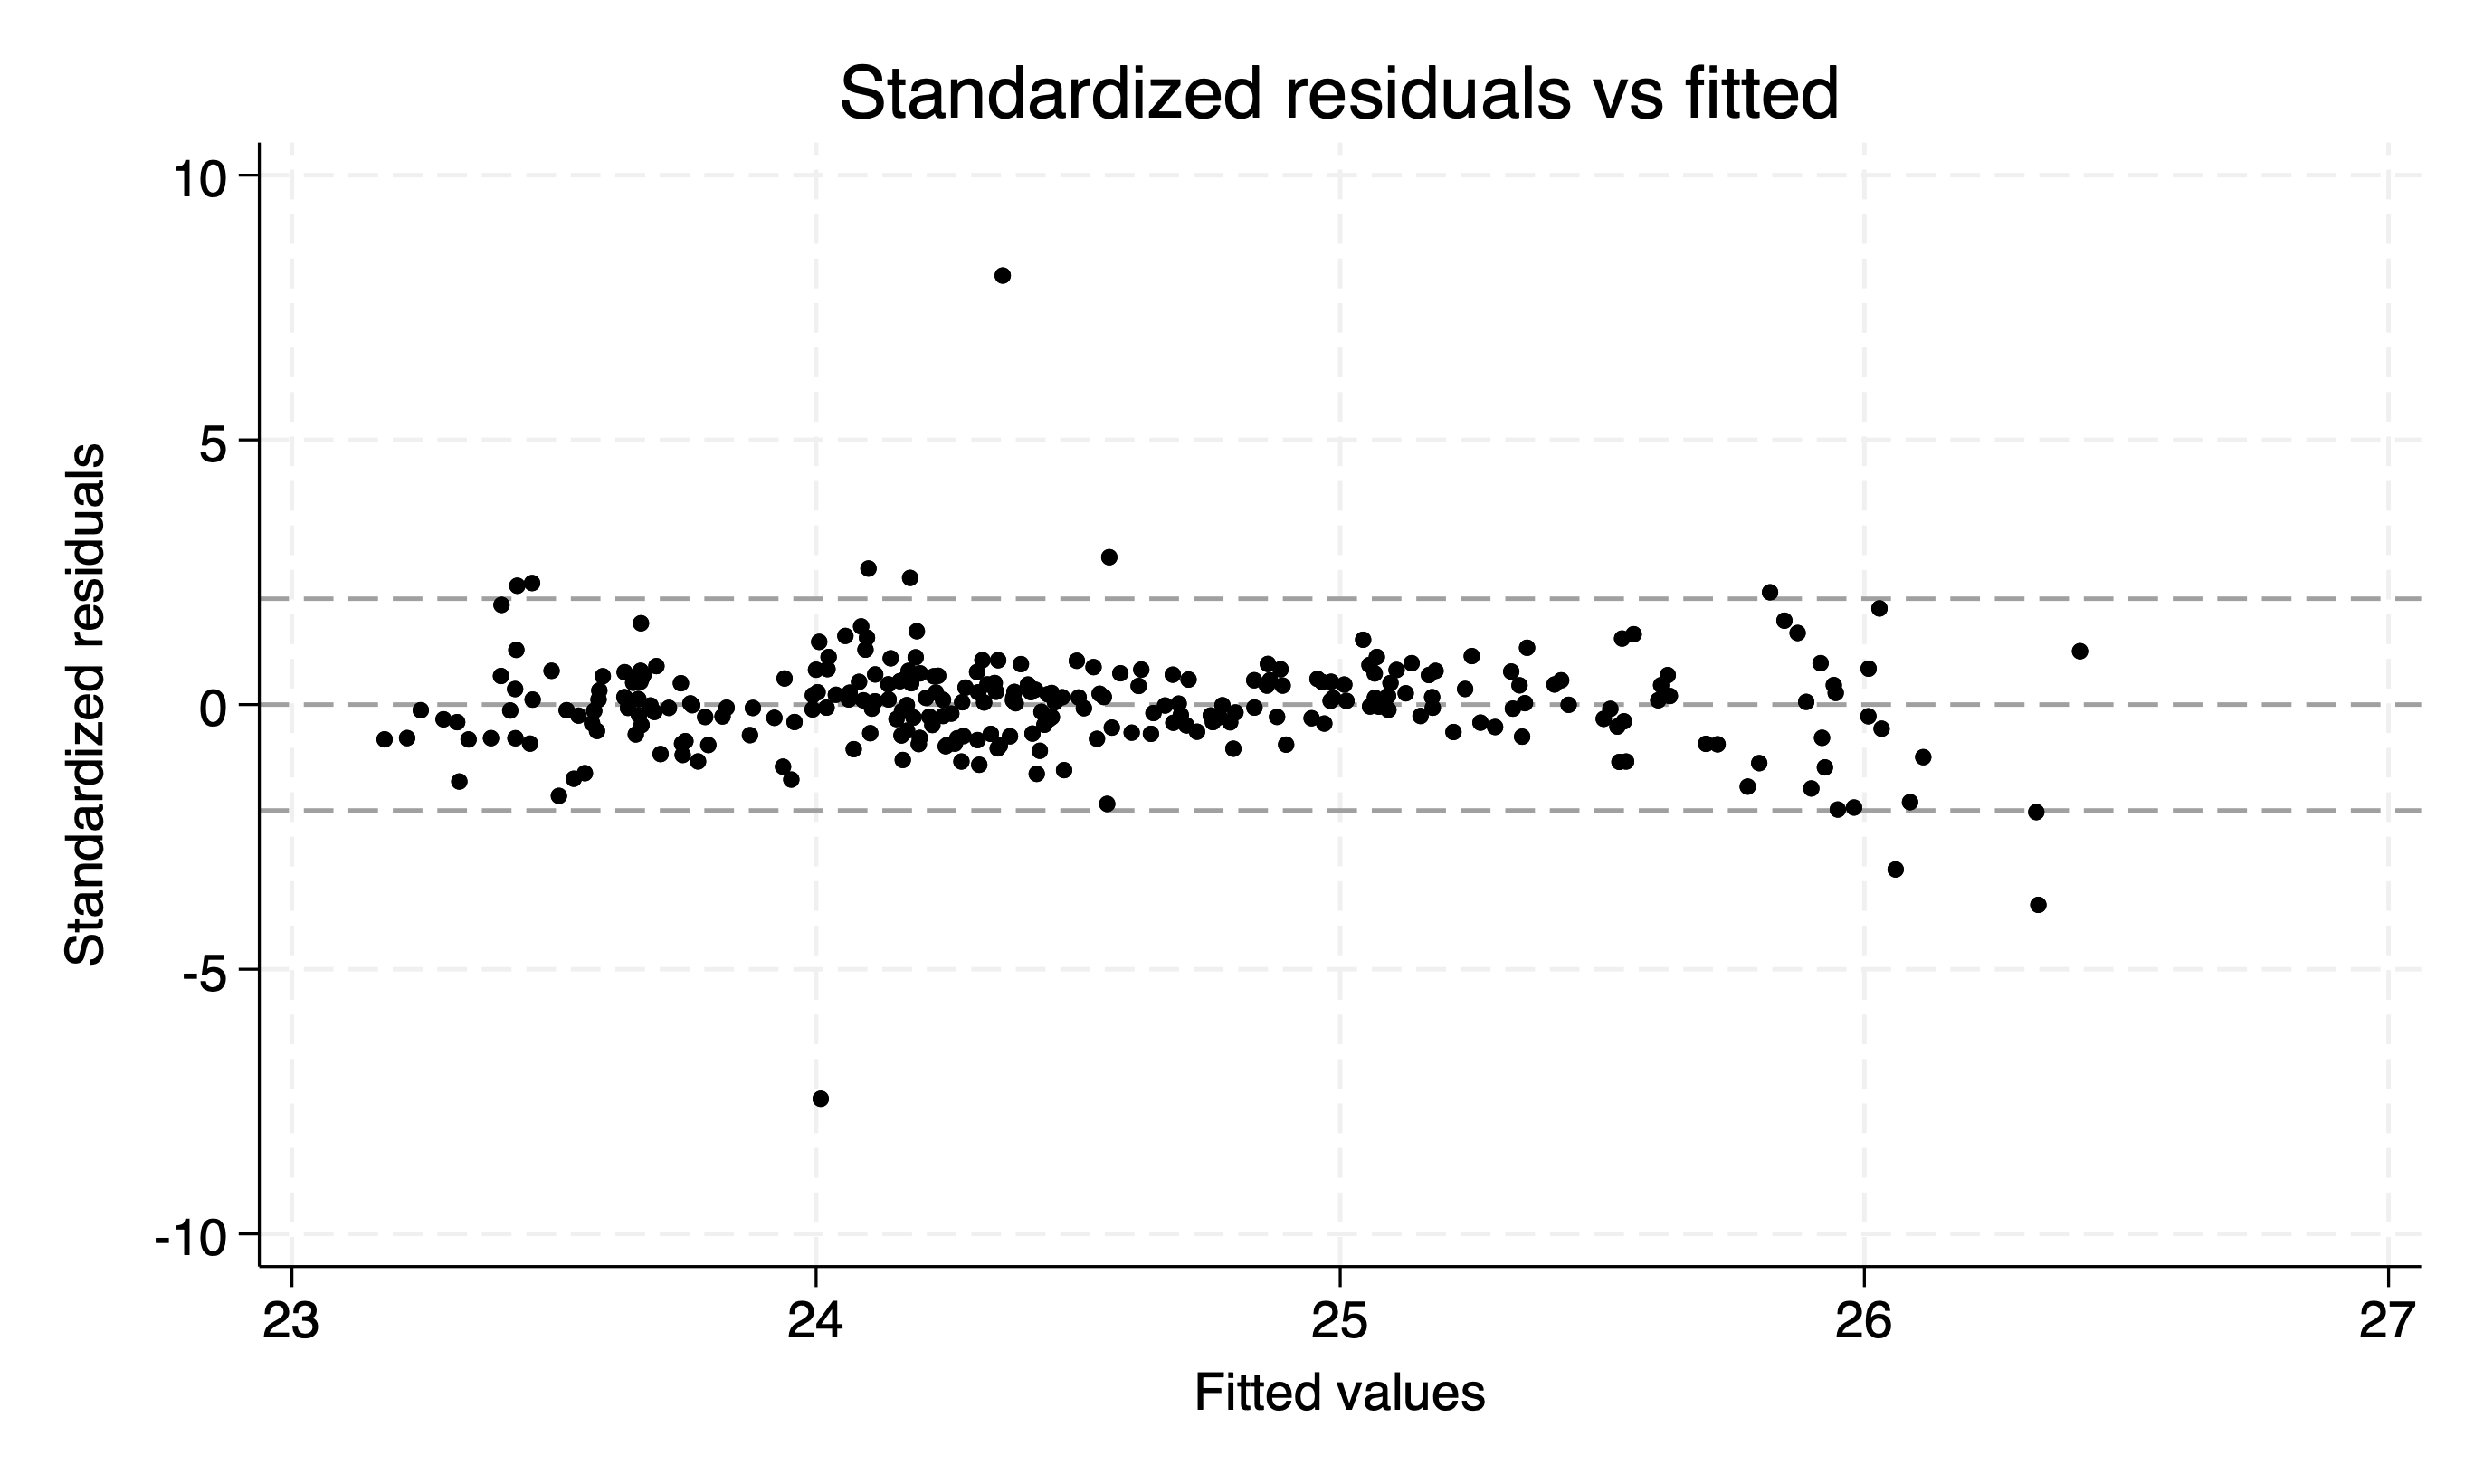


(c) Standardized residuals versus fitted values with reference lines at ±2. No major outliers or influential observations were detected, supporting adequate model fit.

## Abbreviations

AL = axial length
ΔAL = change in axial length
IPTW = inverse probability of treatment weighting
SMD = standardized mean difference
ESS = effective sample size
EMM = estimated marginal mean
LME = linear mixed-effects model
PSM = propensity score matching
